# Supplementary material for: Dna is a New Target of Parp3
Source: PubMed Central journal article supplement (PMC5843604; doi:10.1038/s41598-018-22673-3), 2018-03-08

## DNA IS A NEW TARGET OF PARP3

E.A. Belousova<sup>1</sup>, A.A. Ishchenko<sup>2,3</sup>, O.I. Lavrik<sup>1,4\*</sup>

<sup>1</sup> Institute of Chemical Biology and Fundamental Medicine (ICBFM), SB RAS, Lavrentiev Av. 8,  
Novosibirsk 630090, Russia

<sup>2</sup>Groupe «Réparation de l'ADN», Equipe Labellisée par la Ligue Nationale Contre le Cancer, CNRS  
UMR8200, Univ. Paris-Sud, Université Paris-Saclay, F-94805 Villejuif, France

<sup>3</sup> Gustave Roussy, Université Paris-Saclay, F-94805 Villejuif, France

<sup>4</sup> Novosibirsk State University, Pirogov Str. 2, Novosibirsk 630090, Russia

\*To whom correspondence should be addressed. Tel.: +73833635195; e-mail: lavrik@niboch.nsc.ru

**Figure S1.** The cleavage of the ligated product by APE1. A) Ligation by DNA ligase IIIa with the followed cleavage by APE1 of the initial one-window gapped (lines 4-8) or nicked (lanes 11-15) DNA substrates. The reactions were performed using consequential addition of DNA ligase IIIa and APE1. At the first step, 0.02  $\mu\text{M}$  [<sup>32</sup>P]-DNA substrate in HDB buffer with 10 mM MgCl<sub>2</sub> were treated by 0.1  $\mu\text{M}$  DNA ligase IIIa for 30 min at 37°C, and an aliquot was selected (lanes 4 and 11). Then the mixtures were treated with 1 nM human APE1 at 37°C for 15, 30, 60 and 600 sec. Subsequently, an aliquot of all samples were selected at each time-point. In control experiments 0.02  $\mu\text{M}$  [<sup>32</sup>P]-DNA substrate in HDB buffer with 10 mM MgCl<sub>2</sub> was treated by 1 nM APE1 for 600 sec at 37°C or 10  $\mu\text{M}$  Nudix for 20 h at 37°C. All mixtures were resolved on a 20% polyacrylamide gel containing 7 M urea and 10% formamide in 1x TBE buffer. The gels were dried and subjected to autoradiography and/or phosphorimaging for quantitation using the Typhoon imaging system from GE Healthcare Life Sciences and analysed using OriginPro7.5, Microcal Software, USA. Here, lane 1 shows the DNA electrophoretic mobility of 18 nt oligonucleotide; lanes 2 show the initial mobility of [<sup>32</sup>P]-labelled ADP-DNA substrate. Lanes 5-8 and 12-15 represented the kinetic assay for APE1. Lanes 3 and 10 contained corresponding DNA substrates treated by APE1. Substrates gap-mod and nick-mod represent one-window gapped or nicked DNA duplexes assembled by the same whole DNA strand and contained the ADP-ribose residue at the 5'-end of the [<sup>32</sup>P]-labelled oligonucleotide. "M" inside the circle marks the modification induced by PARP3. The asterisk marks the [<sup>32</sup>P]-label. (B) Quantitative analysis of the assay reactions. The bars in the charts correspond to the respective lanes on the upper autoradiogram.

**A**

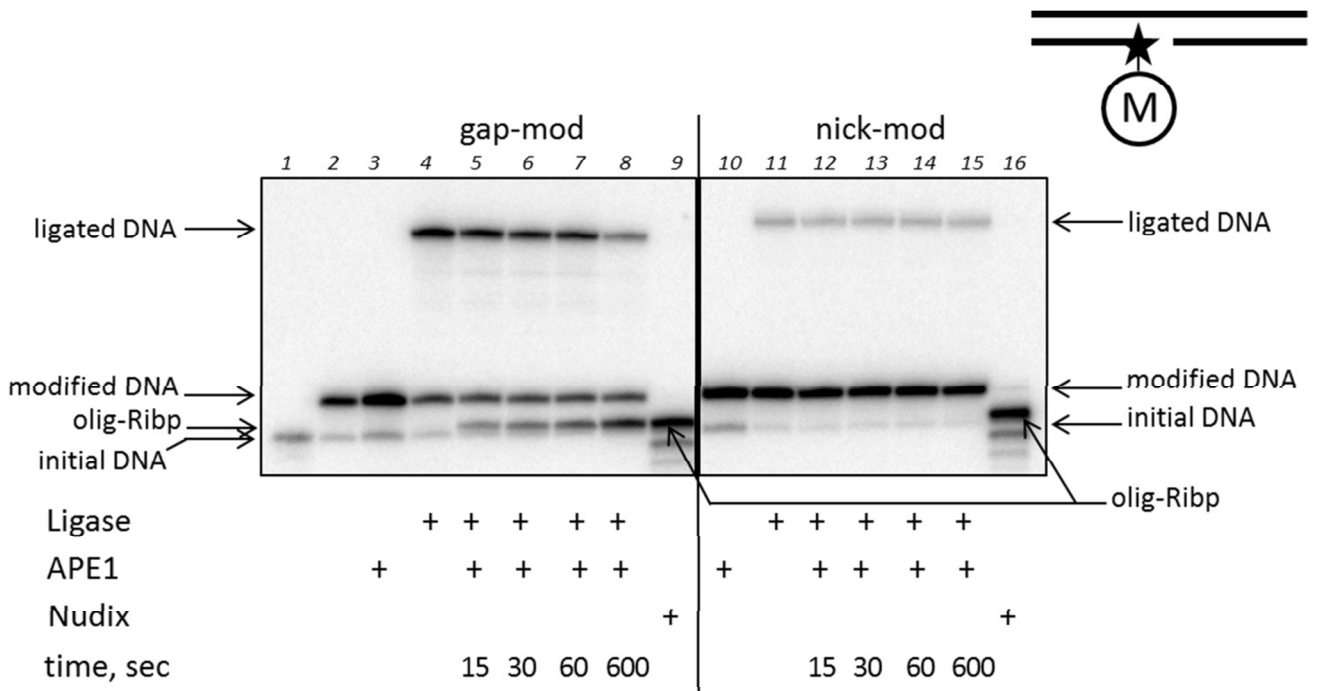

**B**

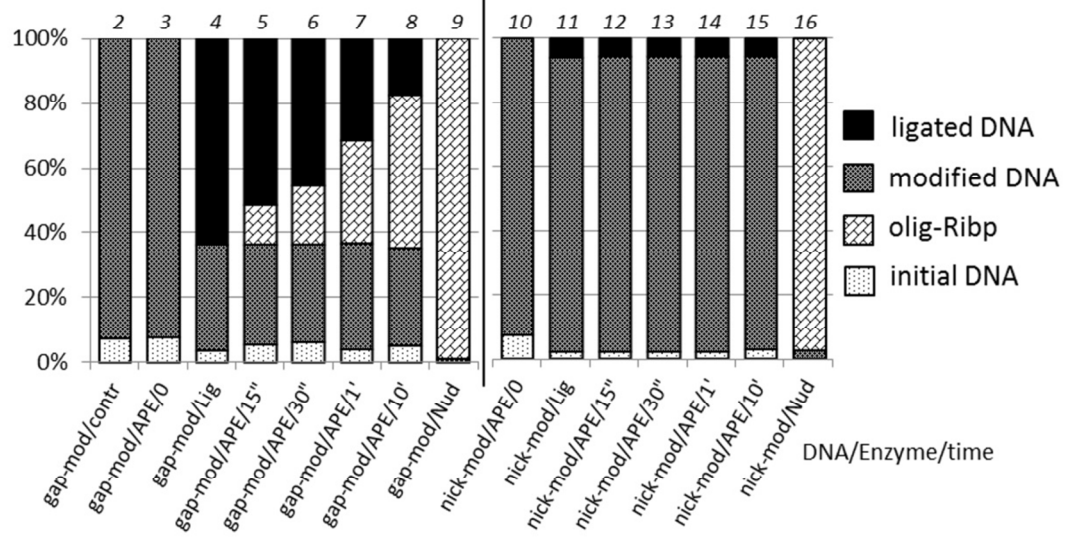

Supplement: 41598_2018_22673_MOESM1_ESM.pdf [file 41598_2018_22673_MOESM1_ESM.pdf]
